# Supplementary material
Source: PubMed Central journal article supplement (PMC3436302)
Supplement: supp_M112.393561_jbc.M112.393561-5.pdf [file supp_M112.393561_jbc.M112.393561-5.pdf]

**Annexin-1-mediated endothelial cell migration and angiogenesis are regulated by VEGF-induced inhibition of miR-196a expression**

**Anne-Laure Pin<sup>1</sup>, François Houle<sup>1</sup>, Patrick Fournier<sup>2</sup>, Maëva Guilloneau<sup>1</sup>, Éric R Paquet<sup>1</sup>,  
Martin J Simard<sup>1</sup>, Isabelle Royal<sup>2</sup> and Jacques Huot<sup>1\*</sup>**

<sup>1</sup>Le Centre de recherche en cancérologie de l'Université Laval and Centre de recherche du CHUQ, l'Hôtel-Dieu de Québec, 9 rue McMahan, Québec G1R 2J6 Canada

<sup>2</sup>CRCHUM-Centre Hospitalier de l'Université de Montréal and Institut du Cancer de Montréal, Montréal, Québec H2L 4M1 Canada

Running title: miR-196a regulates endothelial cell migration

\*To whom correspondence should be addressed at: [Jacques.Huot@fmed.ulaval.ca](mailto:Jacques.Huot@fmed.ulaval.ca)

---

**LEGEND TO SUPPLEMENTAL FIGURES**

**SUPPLEMENTAL FIGURE 1. miR-196a inhibits the time-dependent VEGF-mediated endothelial cell migration in a wound closure assay** **A)** HUVECs were transfected with miR-196a (**C** and **D**) or control (**A** and **B**) mimics (100 nM, for a total of 48 hours). Cells were processed for wound healing assay in response or not (**A** and **C**) to 10 ng/ml of VEGF (**B** and **D**). The black lines represents the edge of the wound and pictures were taken after 0, 8, 12 and 18 hours of treatment. Images were captured using an inverted microscope (10X).

**SUPPLEMENTAL FIGURE 2A. VEGF-mediated formation of capillary-like structures.** HUVECs were firstly transduced with CII-Venus as a control (MOI of 33) and after 48 hours with pmiR-empty (MOI of 65) using lentiviral-mediated infection. 96 hours later, 50 000 transduced cells were plated on a 12 days Normal Human Dermal Fibroblasts (NHDF) monolayer. Co-cultures were maintained for 4 days and media were replaced every 48 hours including VEGF treatment (10 ng/ml) for a total of 2 treatments (n=4). Fluorescent capillary-like structures were observed using an inverted microscope (4X) and pictures were captured every four hours to make movies. Pictures from eight different fields were captured and a representative movie is shown.

**SUPPLEMENTAL FIGURE 2B. miR-196a inhibits VEGF-mediated formation of capillary-like structures.** HUVECs were firstly transduced with CII-Venus as a control (MOI of 33) and after 48 hours with miR-196a precursor (pmiR-196a) (MOI of 65) using lentiviral-mediated infection. 96 hours later, 50 000 transduced cells were plated on a 12 days Normal Human Dermal Fibroblasts (NHDF) monolayer. Co-cultures were maintained for 4 days and media were replaced every 48 hours including VEGF treatment (10 ng/ml) for a total of 2 treatments (n=4). Fluorescent capillary-like structures were observed using an inverted microscope (4X) and pictures were captured every four hours to make movies. Pictures from eight different fields were captured and a representative movie is shown.

**SUPPLEMENTAL FIGURE 2C. Annexin-1 rescues miR-196a inhibition of VEGF-mediated formation of capillary-like structures.** HUVECs were firstly transduced with CSII-Venus-ANXA1 (MOI of 33) and after 48 hours with miR-196a precursor (pmiR-196a) (MOI of 65) using lentiviral-mediated infection. 96 hours later, 50 000 transduced cells were plated on a 12 days Normal Human

Dermal Fibroblasts (NHDF) monolayer. Co-cultures were maintained for 4 days and media were replaced every 48 hours including VEGF treatment (10 ng/ml) for a total of 2 treatments (n=4). Fluorescent capillary-like structures were observed using an inverted microscope (4X) and pictures were captured every four hours to make movies. Pictures from eight different fields were captured and a representative movie is shown.
